# Supplementary material for: Distribution of landfast, drift and glacier ice in Hornsund, Svalbard
Source: Copernicus journal article supplement (doi:10.5194/tc-20-113-2026), 2026-01-08
Supplement: Supplementary file [file tc-20-113-2026-supplement-title-page.pdf › tc-20-113-2026-supplement-title-page.pdf]

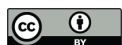

## *Supplement of*

# **Distribution of landfast, drift and glacier ice in Hornsund, Svalbard**

**Zuzanna M. Swirad et al.**

*Correspondence to:* Zuzanna M. Swirad (zswirad@igf.edu.pl) and A. Malin Johansson (malin.johansson@uit.no)

- tc-20-113-2026-supplement-title-page.pdf
- TableS1.txt

The copyright of individual parts of the supplement might differ from the article licence.
